# Supplementary material
Source: PubMed Central journal article supplement (PMC8929402)

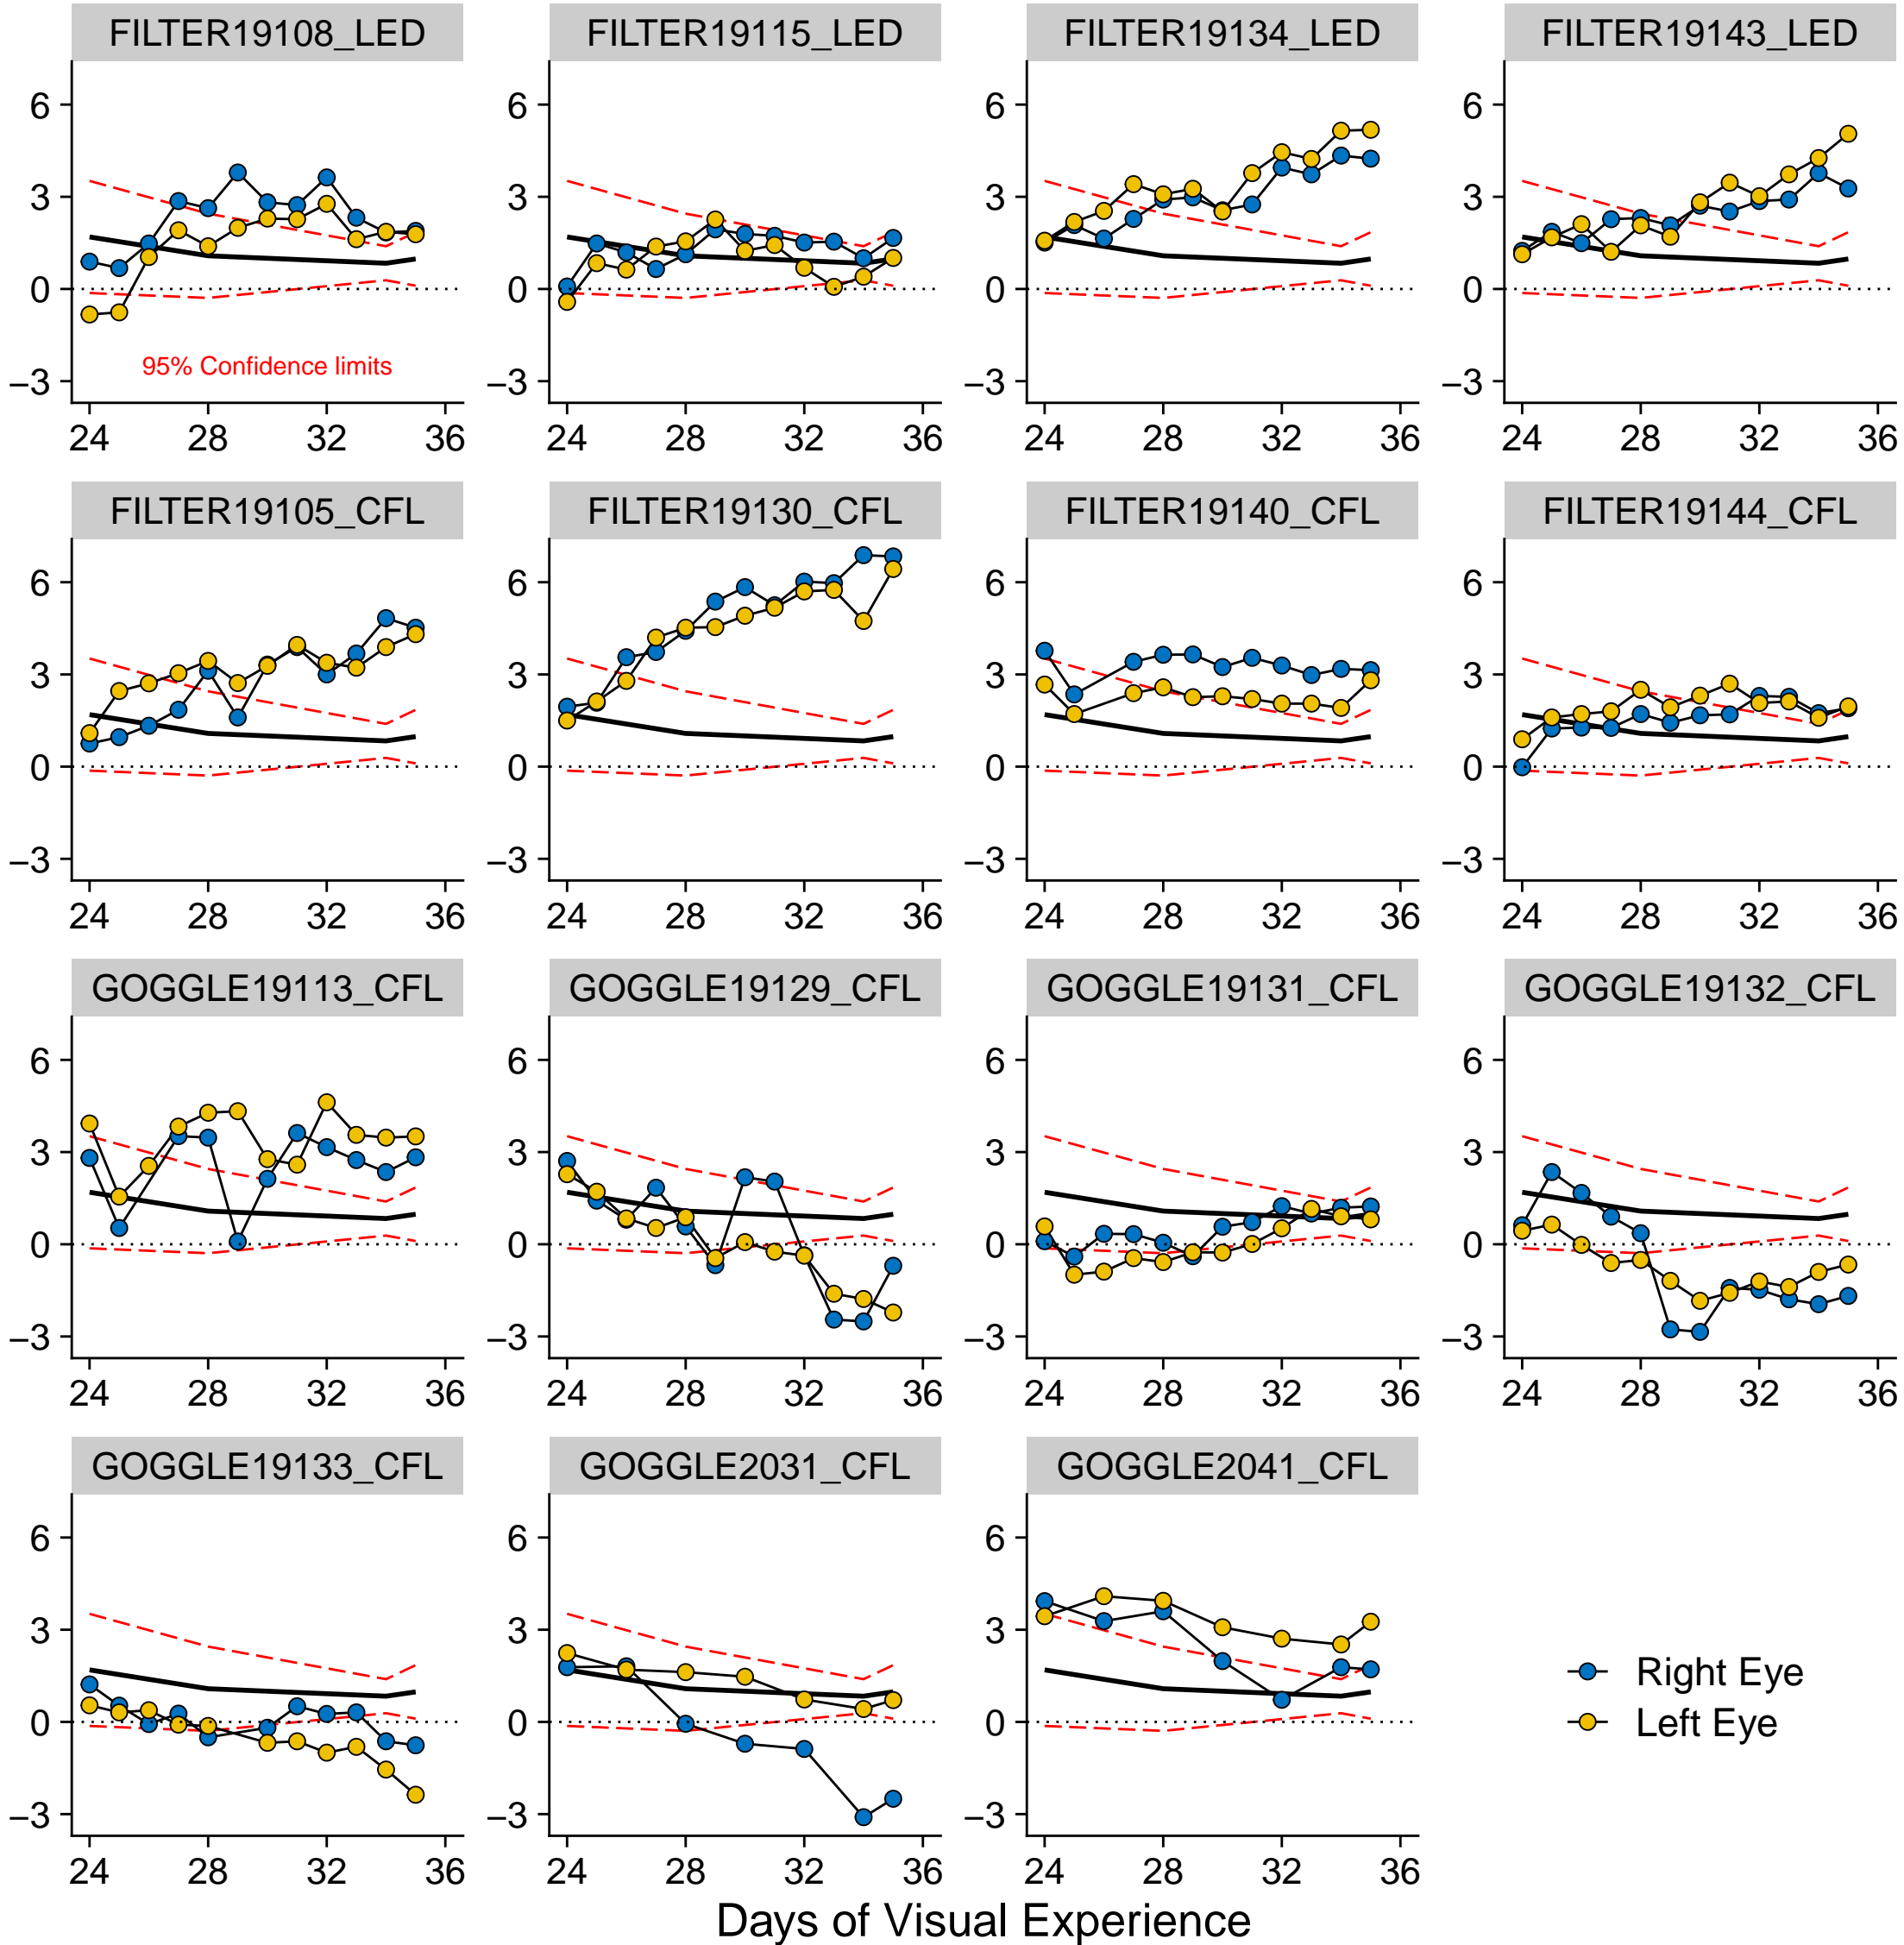

Supplement: NIHMS1781726-supplement-fS2.pdf [file NIHMS1781726-supplement-fS2.pdf]
